# Supplementary material for: Human heme oxygenase 1 is a potential host cell factor against dengue virus replication
Source: PubMed Central journal article supplement (PMC4995454; doi:10.1038/srep32176), 2016-08-24
Supplement: srep32176-s1.pdf [file srep32176-s1.pdf]

Human heme oxygenase 1 is a potential host cell factor against dengue virus replication.

Chin-Kai Tseng<sup>1,2</sup>, Chun-Kuang Lin<sup>3</sup>, Yu-Hsuan Wu<sup>1</sup>, Yen-Hsu Chen<sup>4,5,6,7</sup>, Wei-Chun Chen<sup>8</sup>,  
Kung-Chia Young<sup>1,2,9\*</sup>, Jin-Ching Lee<sup>10,11,12\*</sup>

<sup>1</sup> Institute of Basic Medical Sciences, College of Medicine, National Cheng Kung University,  
Tainan, Taiwan

<sup>2</sup> Center of Infectious Disease and Signaling Research, College of Medicine, National Cheng  
Kung University, Tainan, Taiwan

<sup>3</sup> Doctoral Degree Program in Marine Biotechnology, College of Marine Sciences, National Sun  
Yat-Sen University, Kaohsiung, Taiwan

<sup>4</sup> Division of Infectious Diseases, Department of Internal Medicine, Kaohsiung Medical  
University Hospital, Kaohsiung, Taiwan

<sup>5</sup> School of Medicine, Graduate Institute of Medicine, Sepsis Research Center, Center for  
Dengue Fever Control and Research, Kaohsiung Medical University, Kaohsiung, Taiwan

<sup>6</sup> Department of Biological Science and Technology, College of Biological Science and  
Technology, National Chiao Tung University, HsinChu, Taiwan

<sup>7</sup> Center for Dengue Fever Control and Research, Kaohsiung Medical University, Kaohsiung,  
Taiwan.

<sup>8</sup>Graduate Institute of Medicine, College of Medicine, Kaohsiung Medical University, Kaohsiung, Taiwan.

<sup>9</sup>Department of Medical Laboratory Science and Biotechnology, College of Medicine, National Cheng Kung University, Tainan, Taiwan

<sup>10</sup>Department of Biotechnology, College of Life Science, Kaohsiung Medical University, Kaohsiung, Taiwan

<sup>11</sup>Graduate Institute of Natural Products, College of Pharmacy, Kaohsiung Medical University, Kaohsiung, Taiwan

<sup>12</sup>Research Center for Natural Products and Drug Development, Kaohsiung Medical University, Kaohsiung, Taiwan

**Running title:** Heme oxygenase 1 against dengue virus

**\*Corresponding authors:** Jin-Ching Lee and Kung-Chia Young

**Mail address:** Department of Biotechnology, Kaohsiung Medical University, 100, Shih-Chuan 1<sup>st</sup> Road, San Ming District, 807 Kaohsiung City, Taiwan.

**Phone:** 886-7-312-1101 ext. 2369      **Fax:** 886-7-312-5339

**E-mail:** jclee@kmu.edu.tw and t7908077@mail.ncku.edu.t

## **Supplementary material and method**

### **Cell cytotoxicity assay**

Huh-7 cells were plated in 96-well plates at  $5 \times 10^3$  per well and treated with chemicals at indicated conditions. The cell viability was determined by the CellTiter 96 AQueous One Solution Cell Proliferation Assay (Promega, WI, USA) according to the manufacturer's instructions. Color intensity was detected at 490 nm using a 550 BioRad plate-reader (Bio-Rad, Hertfordshire, UK).

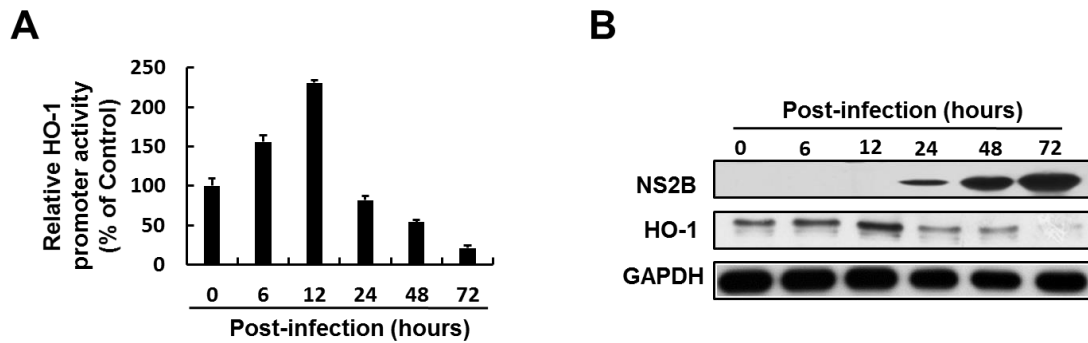

**Figure S1.** Time course analysis of HO-1 (A) promoter activity and (B) protein expression influenced by DENV infection.

Huh-7 cells were co-transfected with 0.5  $\mu\text{g}$  of pHO-1-Luc and 0.1  $\mu\text{g}$  of pCMV-renilla, and followed by DENV infection at an M.O.I. of 5. The values in promoter activity are expressed as a relative percentage change compared with zero time-point of infection (defined as 100%) following normalization of Renilla luciferase activity. The HO-1 protein expression was measured by western blotting with anti-DENV NS2B, HO-1 and GAPDH antibodies. Error bars denote the means  $\pm$  SD of 3 independent experiments.

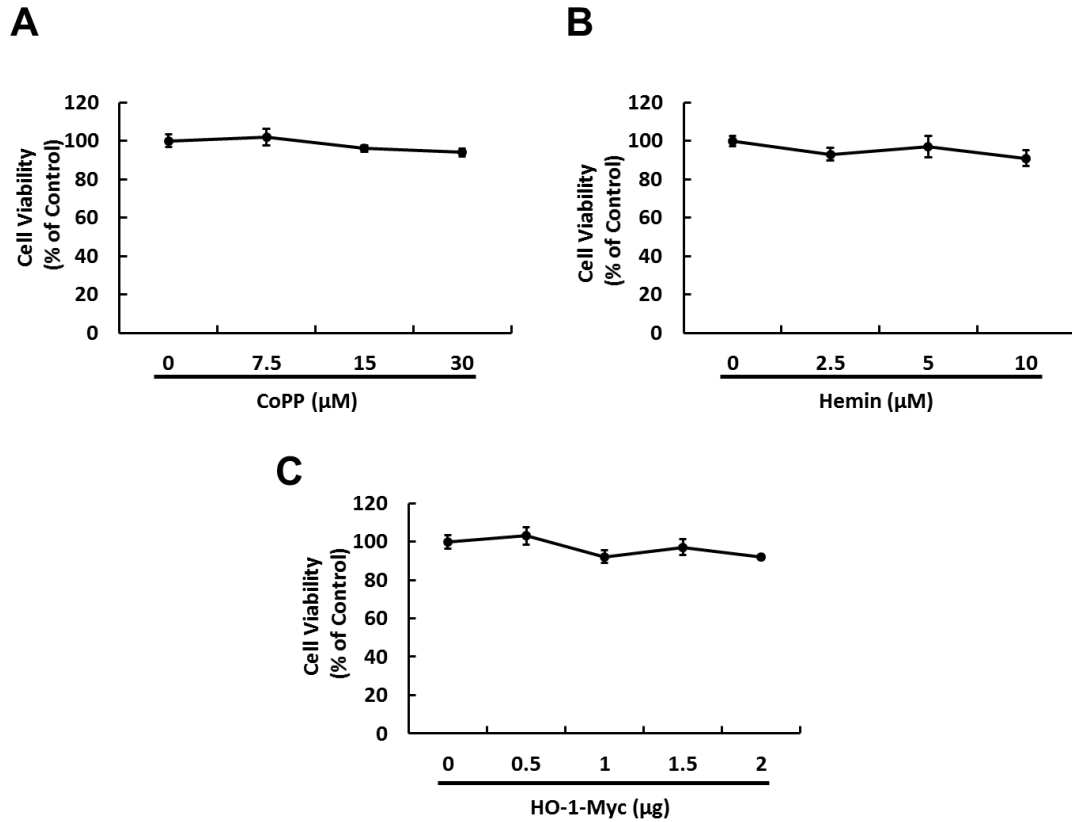

**Figure S2.** Effect of CoPP and hemin on the cell viability of Huh-7 cells.

Huh-7 cells were plated  $5 \times 10^3$  per well in the 96-well plate and treated with CoPP or hemin at the indicated concentrations for 3 days. Cell viability was measured by the CellTiter 96 AQueous One Solution Cell Proliferation Assay. Error bars indicate the means  $\pm$  SD of 3 independent experiments. \* $P < 0.05$ ; \*\* $P < 0.01$ .

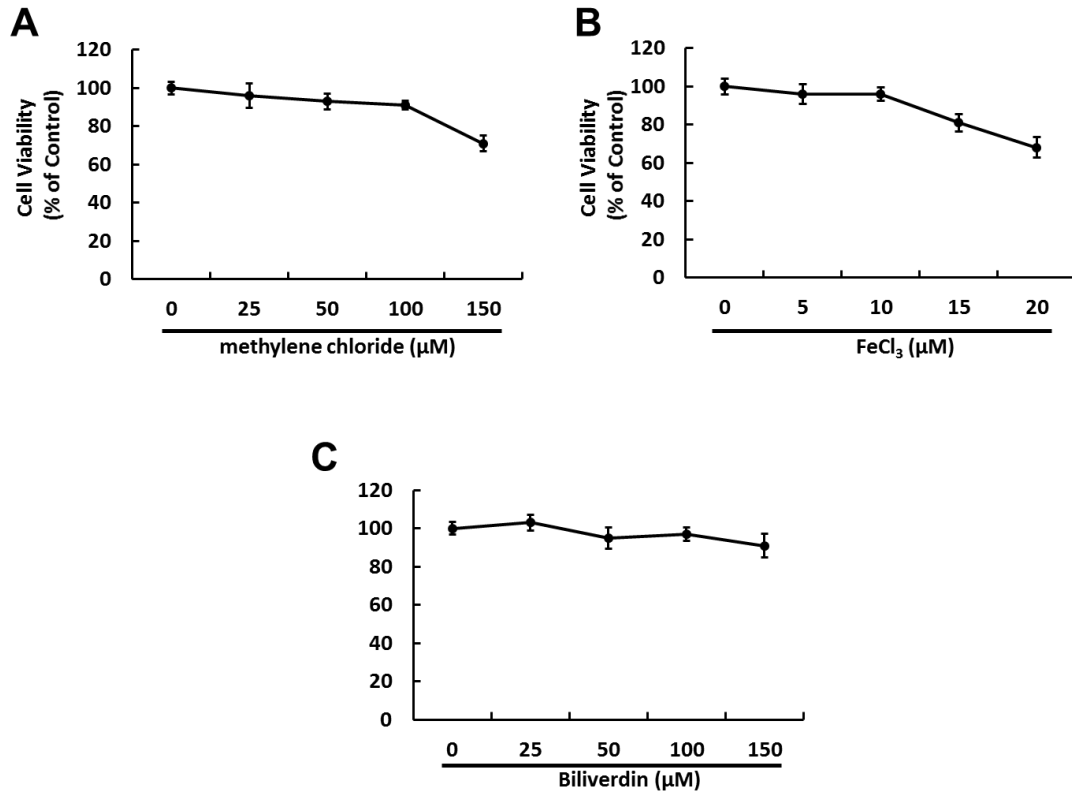

**Figure S3.** Effect of Methylene chloride, Iron(III) chloride and biliverdin on the cell viability of Huh-7 cells.

Huh-7 cells were plated  $5 \times 10^3$  per well in the 96-well plates and treated with Methylene chloride, Iron(III) chloride or biliverdin at the indicated concentrations for 3 days. Cell viability was measured by the CellTiter 96 AQueous One Solution Cell Proliferation Assay. Error bars indicate the means  $\pm$  SD of 3 independent experiments. \* $P < 0.05$ ;

\*\* $P < 0.01$ .

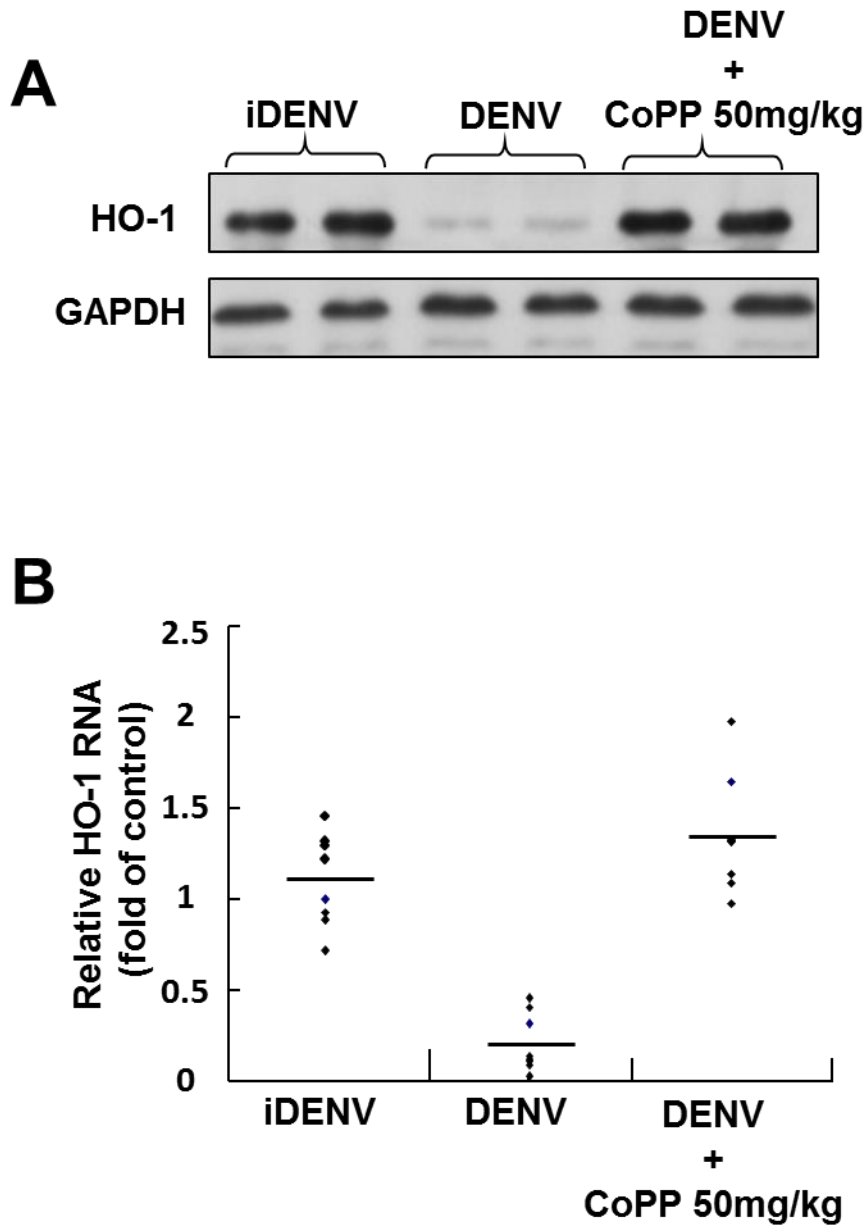

**Figure S4.** HO-1-specific inducer CoPP increases HO-1 expression in DENV-infected ICR suckling mice.

Six-day-old ICR suckling mice were injected with  $2.5 \times 10^5$  pfu DENV-2 intracerebrally and with CoPP (50 mg/kg) intraperitoneally at 1, 3, and 5 dpi. Next, 0.1 g of brain tissue of these mice was lysed in RIPA lysis buffer, and treated with TRIzol reagent for protein extraction, and RNA extraction, respectively. (A) HO-1 protein

levels were measured by performing western blotting by using HO-1-specific antibody, with GAPDH as the equal loading control. (B) HO-1 mRNA level was measured by performing RT-qPCR with specific primers against the gene encoding HO-1. The mRNA level of HO-1 was normalized against that of cellular *gapdh* and was presented as fold change relative to that in non-CoPP-treated mice (defined as 1). Mice in the control group were treated with 60°C heat-inactive DENV for 30 min. Each group had 8–10 mice.



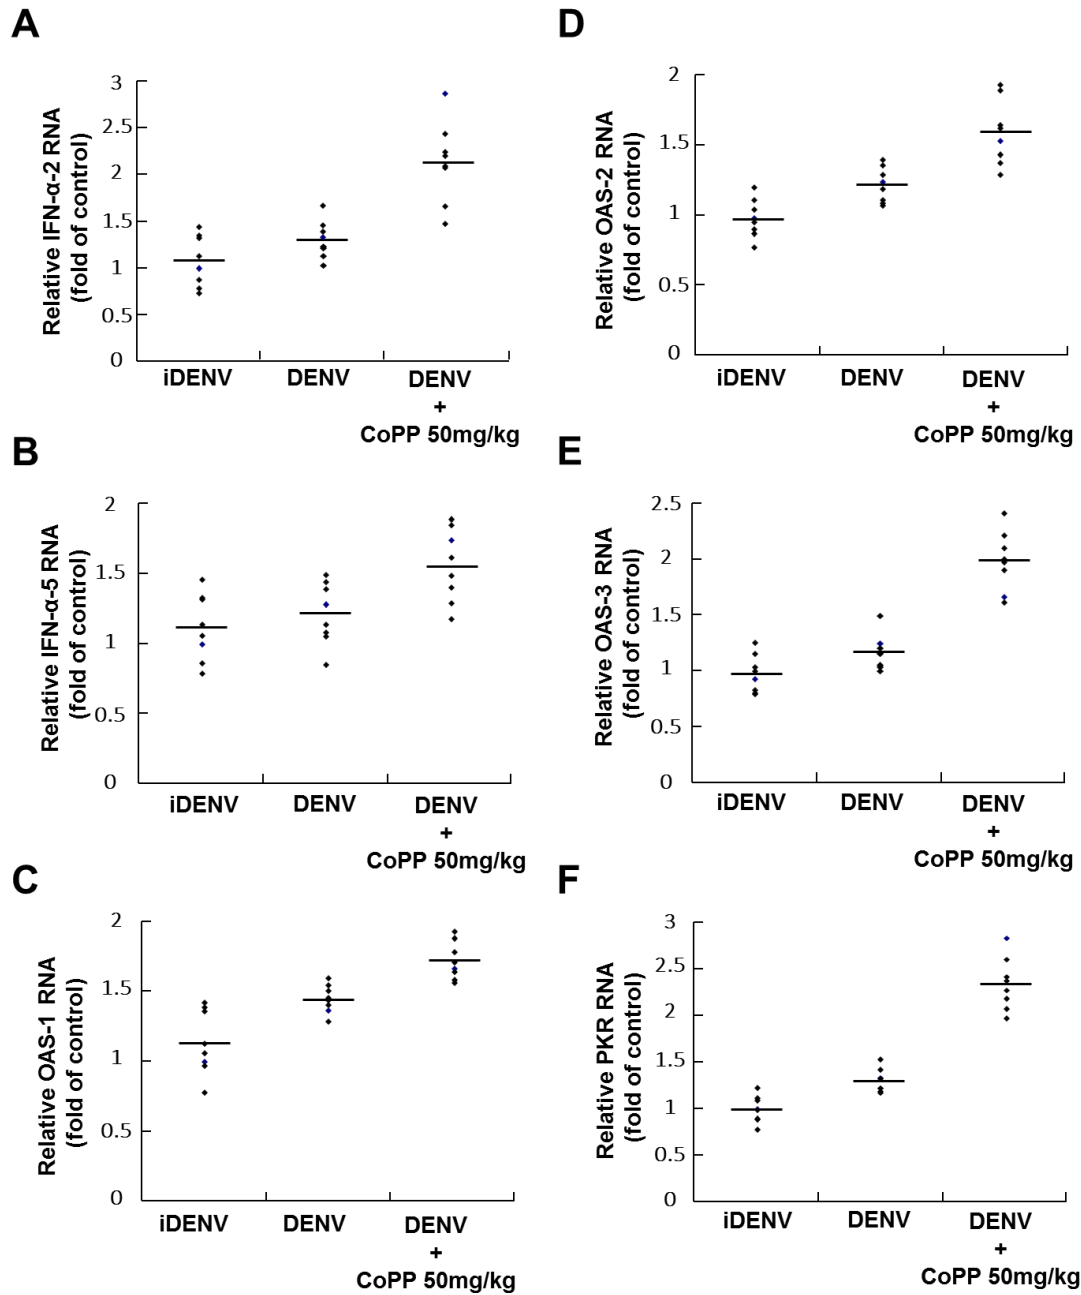

**Figure S5.** HO-1-specific inducer CoPP induces antiviral IFN responses in DENV-infected ICR suckling mice.

Six-day-old ICR suckling mice were injected with  $2.5 \times 10^5$  pfu DENV-2 intracerebrally and with CoPP (50 mg/kg) intraperitoneally at 1, 3 and 5 dpi. Next, 0.1 g of brain tissue of these mice was treated with TRIZOL reagent for RNA extraction. The

mRNA level of genes encoding (A) IFN- $\alpha$ -2, (B) IFN- $\alpha$ -5, (C) OAS1, (D) OAS2, (E) OAS3, and (F) PKR were measured by performing RT-qPCR with specific primers, were normalized against that of cellular *gapdh*, and were presented as fold change relative to that in non-CoPP-treated mice (defined as 1). Mice in the control group were treated with 60°C heat-inactive DENV for 30 min. Each group included 8–10 mice.

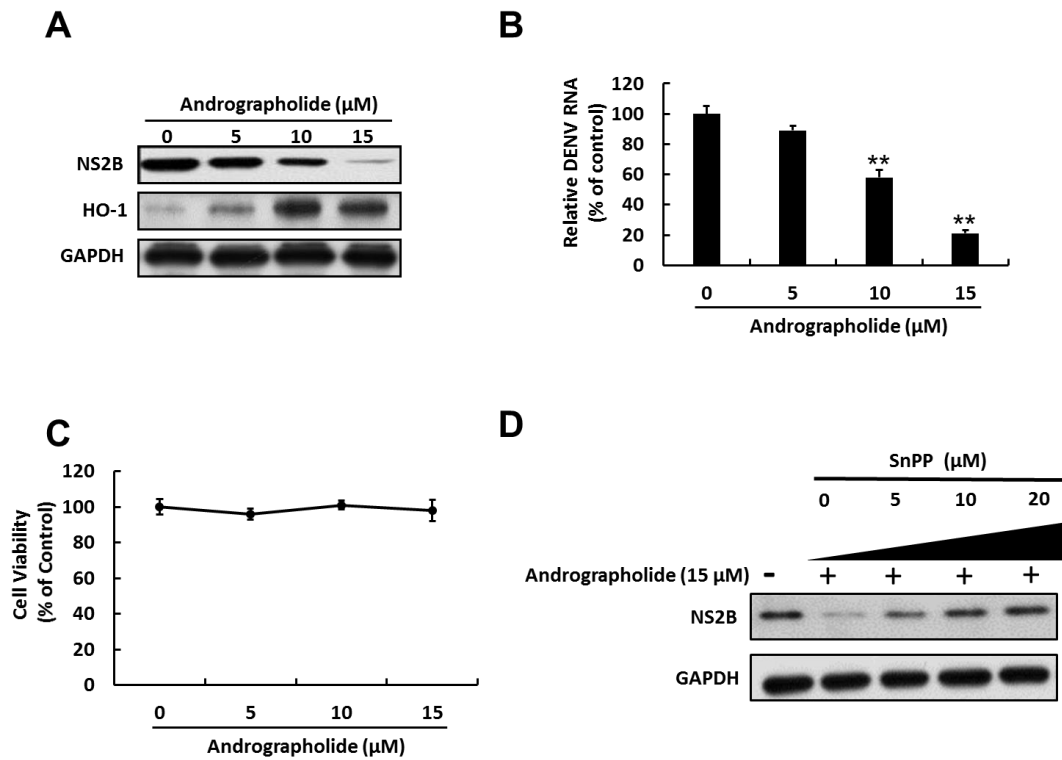

**Figure S6.** Andrographolide inhibits DENV replication via inducing HO-1 protein expression.

Andrographolide enhances (A) HO-1 protein synthesis and inhibits DENV protein synthesis and (B) RNA replication. DENV-infected Huh-7 cells were treated with andrographolide at 5, 10, 15 and 20 μM for 3 days. Western blotting assay was employed to examine the HO-1 and DENV protein expression. Levels of GAPDH were used as equal loading control. The DENV RNA level was normalized against that of cellular *gapdh* and were presented as percentage change relative to that in parental Huh-7 cells (defined as 100%). (C) Effect of andrographolide on the cell viability of Huh-7 cells. Huh-7 cells were plated  $5 \times 10^3$  per well in the 96-well plates and treated with andrographolide at the indicated concentrations for 3 days. Cell viability was measured

by the CellTiter 96 AQueous One Solution Cell Proliferation Assay. (D) SnPP rescues the inhibitory effect of andrographolide on DENV protein synthesis. DENV-infected Huh-7 cells were coincubated with 20  $\mu$ M andrographolide and increasing concentrations of HO-1-specific inhibitor SnPP (0-20  $\mu$ M) for 3 days. The total cells lysates were examined by performing western blotting to analyze DENV protein level. Levels of GAPDH were used as equal loading control.

**Table S1.** Oligonucleotide sequences for real-time RT-PCR

| <b>Oligonucleotide Name</b>                 | <b>Sequence 5'-3'</b>         |
|---------------------------------------------|-------------------------------|
| <b>DENV gene oligonucleotide sequences</b>  |                               |
| 5' NS5                                      | 5'-GGA AACCAAGCTGCCCATCA      |
| 3' NS5                                      | 5'-CCTCCACGGATAGAAGTTTA       |
| <b>Human gene oligonucleotide sequences</b> |                               |
| 5' GAPDH                                    | 5'-GTCTTCACCACCATGGAGAA       |
| 3' GAPDH                                    | 5'-ATGGCATGGACTGTGGTCAT       |
| 5' OAS1                                     | 5'- CAAGCTTAAGAGCCTCATCC      |
| 3' OAS1                                     | 5'- TGGGCTGTGTTGAAATGTGT      |
| 5' OAS2                                     | 5'- ACAGCTGAAAGCCTTTTGGA      |
| 3' OAS2                                     | 5'- GCATTAAAGGCAGGA AGCAC     |
| 5' OAS3                                     | 5'- CACTGACATCCCAGACGATG      |
| 3' OAS3                                     | 5'- GATCAGGCTCTTCAGCTTGG      |
| 5' PKR                                      | 5'- ATGATGGAAAGCGAACAAGG      |
| 3' PKR                                      | 5'- GAGATGATGCCATCCCGTAG      |
| 5' IFN-alpha 2                              | 5'-GCA AGT CAA GCT GCT CTG TG |
| 3' IFN-alpha 2                              | 5'-GAT GGT TTC AGC CTT TTG GA |

|                 |                               |
|-----------------|-------------------------------|
| 5' IFN-alpha 5  | 5' - AGTTTGATGGCAACCAGTTC     |
| 3' IFN-alpha 5  | 5' - TCAGAGGAGTGTCTTCCACT     |
| 5' IFN-alpha 17 | 5'-AGG AGT TTG ATG GCA ACC AG |
| 3' IFN-alpha 17 | 5'-CAT CAG GGG AGT CTC TTC CA |

---

**Mice gene oligonucleotide sequences**

---

|                |                               |
|----------------|-------------------------------|
| 5' GAPDH       | 5'-GTCTTCACCACCATGGAGAA       |
| 3' GAPDH       | 5'-ATGGCATGGACTGTGGTCAT       |
| 5' OAS1        | 5' - CAAGCTTAAGAGCCTCATCC     |
| 3' OAS1        | 5' - TGGGCTGTGTTGAAATGTGT     |
| 5' OAS2        | 5' - ACAGCTGAAAGCCTTTTGGA     |
| 3' OAS2        | 5' - GCATTAAAGGCAGGA AGCAC    |
| 5' OAS3        | 5' - CACTGACATCCCAGACGATG     |
| 3' OAS3        | 5' - GATCAGGCTCTTCAGCTTGG     |
| 5' PKR         | 5' - ATGATGGAAAGCGAACAAGG     |
| 3' PKR         | 5' - GAGATGATGCCATCCCGTAG     |
| 5' IFN-alpha 2 | 5'-GCA AGT CAA GCT GCT CTG TG |
| 3' IFN-alpha 2 | 5'-GAT GGT TTC AGC CTT TTG GA |
| 5' IFN-alpha 5 | 5' - AGTTTGATGGCAACCAGTTC     |
| 3' IFN-alpha 5 | 5' - TCAGAGGAGTGTCTTCCACT     |

5' IFN-alpha 17

5'-AGG AGT TTG ATG GCA ACC AG

3' IFN-alpha 17

5'-CAT CAG GGG AGT CTC TTC CA

---
